# Supplementary material for: A reversible decoration of multi-walled carbon nanotubes (MWCNTs) by acyclic η4-(1E,3E)-dienyl-Fe(CO)3 complexes
Source: Royal Society of Chemistry journal article supplement (doi:10.1039/b715913g), 2008-01-01
Supplement: b715913g.pdf [file b715913g.pdf]

## Electronic Supplementary Information

### A Reversible Decoration of Multi-Walled Carbon Nanotubes (MWCNTs) by Acyclic $\eta^4$ -(1*E*,3*E*)-Dienyl-Fe(CO)<sub>3</sub> Complexes

By Jean-Paul Lellouche,\* Maytal Piran, Lior Shahar, Judith Grinblat and Christophe Pirlot

\* Corresponding author. E-mail: lellouj@mail.biu.ac.il

1. Adsorption of iron complexes using the DMF-based aqueous protocol. Illustrative photographs of the experimental process p. 2
2. FT-IR spectra of iron-complexed MWCNT-Fe(CO)<sub>3</sub> & table of characteristic metallic Fe-C≡O absorption peaks p. 3-7
3. Selected high resolution SEM pictures of MWCNTs decorated by the neutral iron complex **5a** (EDAX elemental analyses) p. 8-10
4. Selected high resolution TEM pictures of MWCNTs decorated by the neutral iron complex **5a** (EDAX elemental analyses) p. 11
5. Selected XPS data for MWCNTs decorated by neutral iron complexes, **1a**, **3a-4a**, and **7a-8a** p. 12-16
6. Selected high resolution SEM pictures of MWCNTs after iron complex desorption. Case of the CH<sub>3</sub>CN-dissociated composite MWCNT-**5a** (EDAX elemental analyses) p. 17-18
7. Global-energy GMMX-minimized structures of effective & selected ineffective complexes, **1a**, **3a-4a**, **6a-8a**, and  $\psi$ -endo/ $\psi$ -exo-**9a** and **10a** p. 19-22
8. XPS analysis of untreated (**a**) and oxidized (**b**) MER MWCNTs p. 23
9. Thermogravimetric analysis of iron-complexed composites. Case of composite MWCNT-**5a** p. 24
10. Raman spectra of MWCNT samples (MWCNTs obtained after dissociation of composite MWCNT-**5a** and untreated starting MWCNTs) p. 25

**1. Adsorption of iron complexes using the DMF-based aqueous protocol. Illustrative photographs of the experimental process**

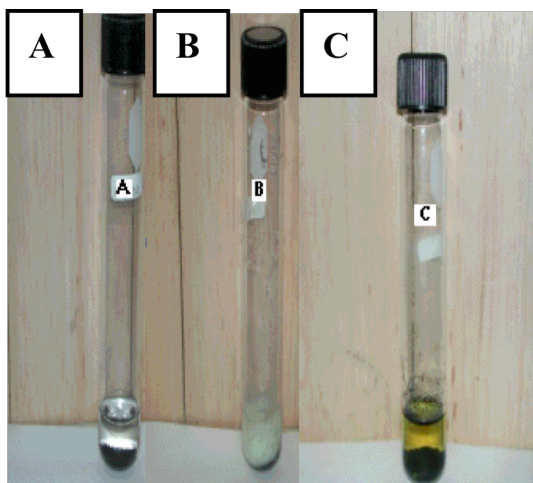

**A:** Water-decanted MWCNTs. **B:** milky MWCNT suspension resulting from the addition of complex **6a** dissolved in a minimal volume of DMF. **C:** decanted iron-complexed MWCNTs [MWCNTs-Fe(CO)<sub>3</sub>] at adsorption completion.

**2. FT-IR spectra of iron-complexed MWCNT-Fe(CO)<sub>3</sub> & table of characteristic metallic Fe-C≡O absorption peaks (starting iron complexes *versus* iron-complexed composites MWCNT-Fe(CO)<sub>3</sub>)**

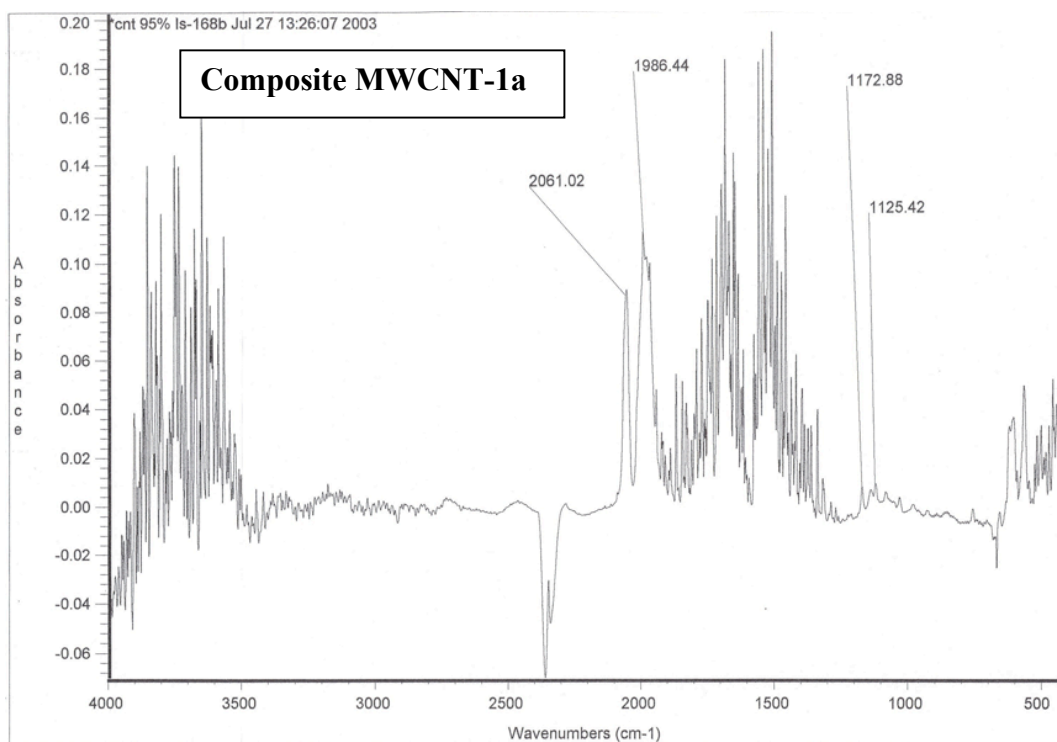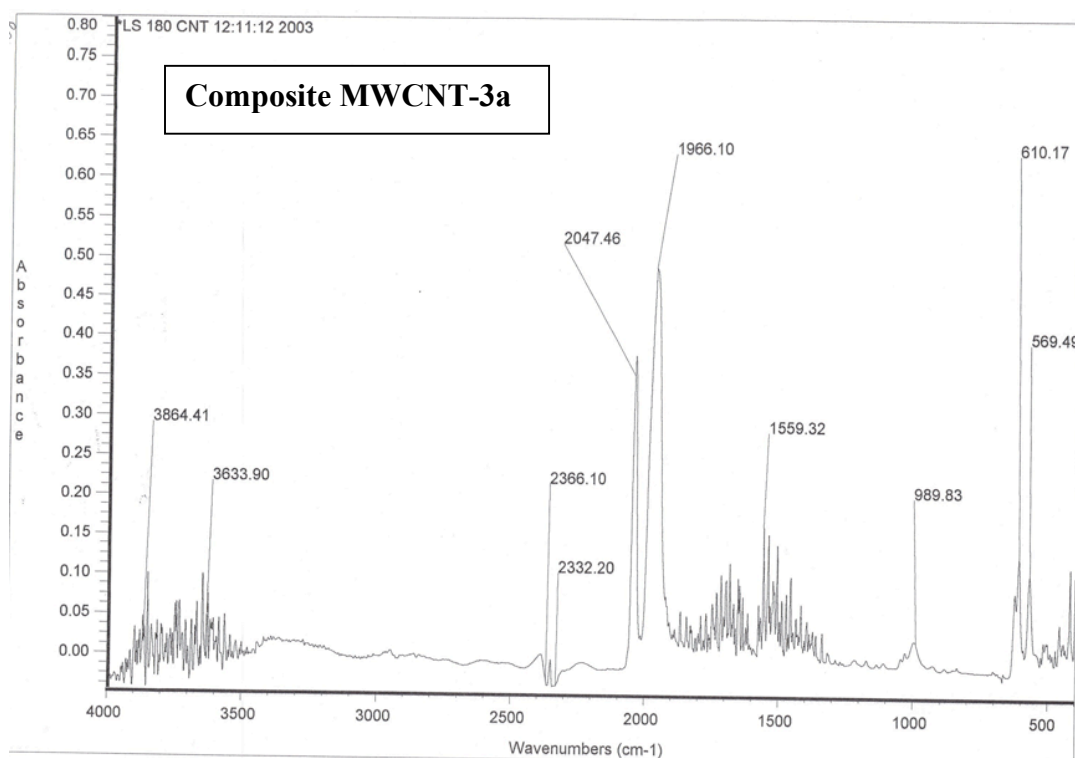

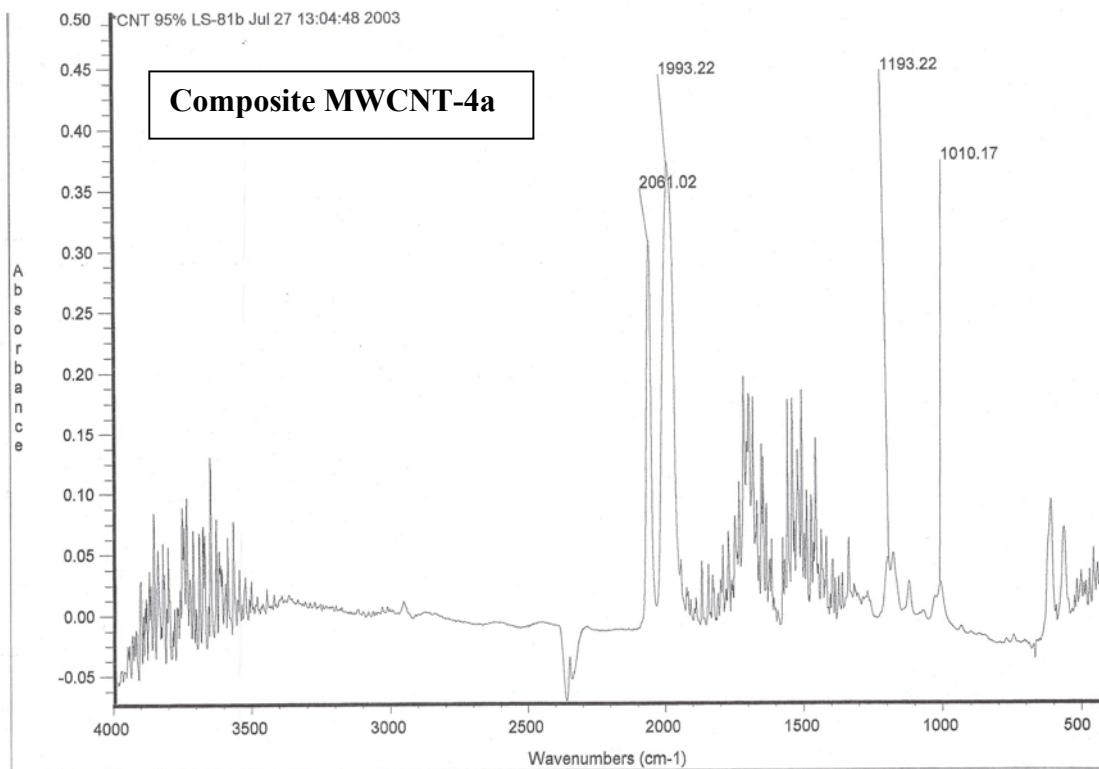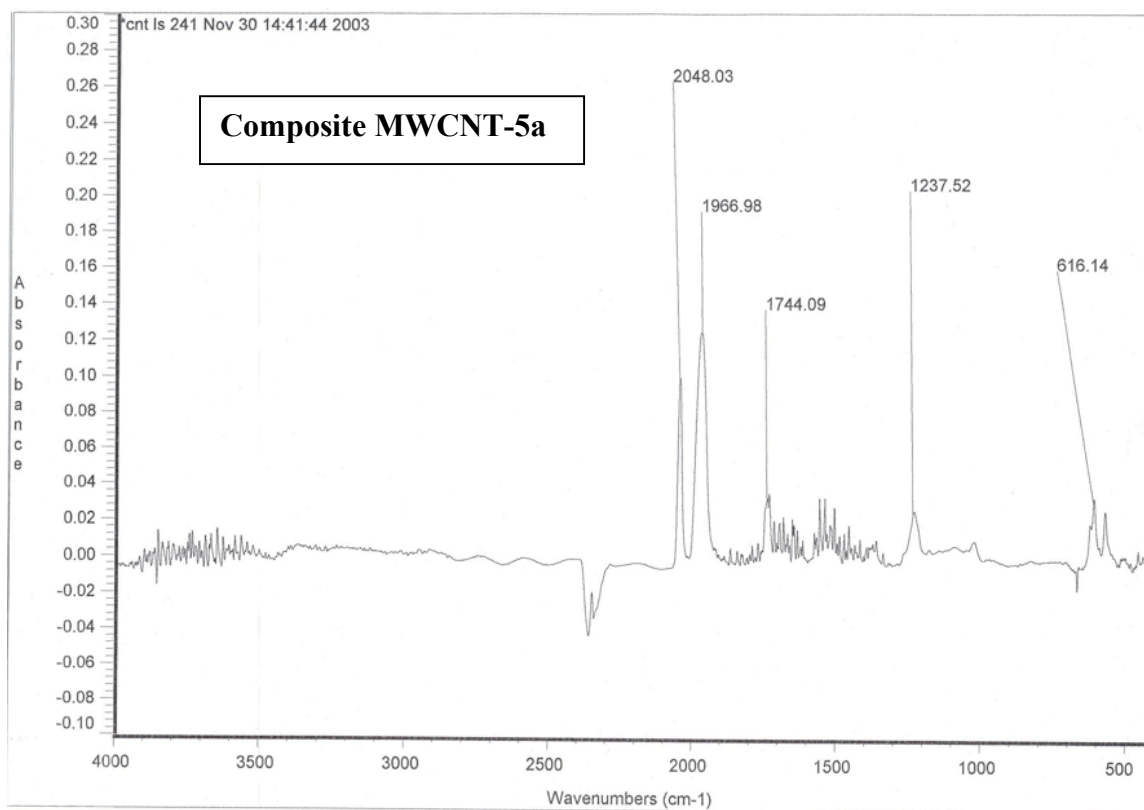

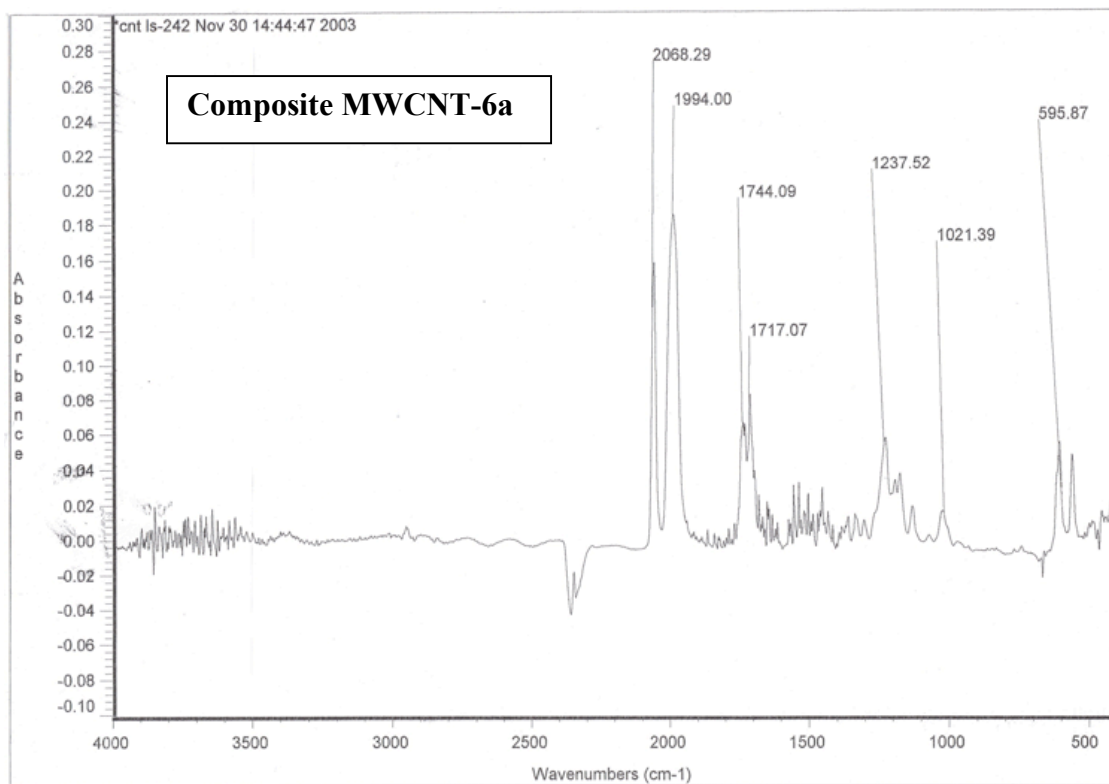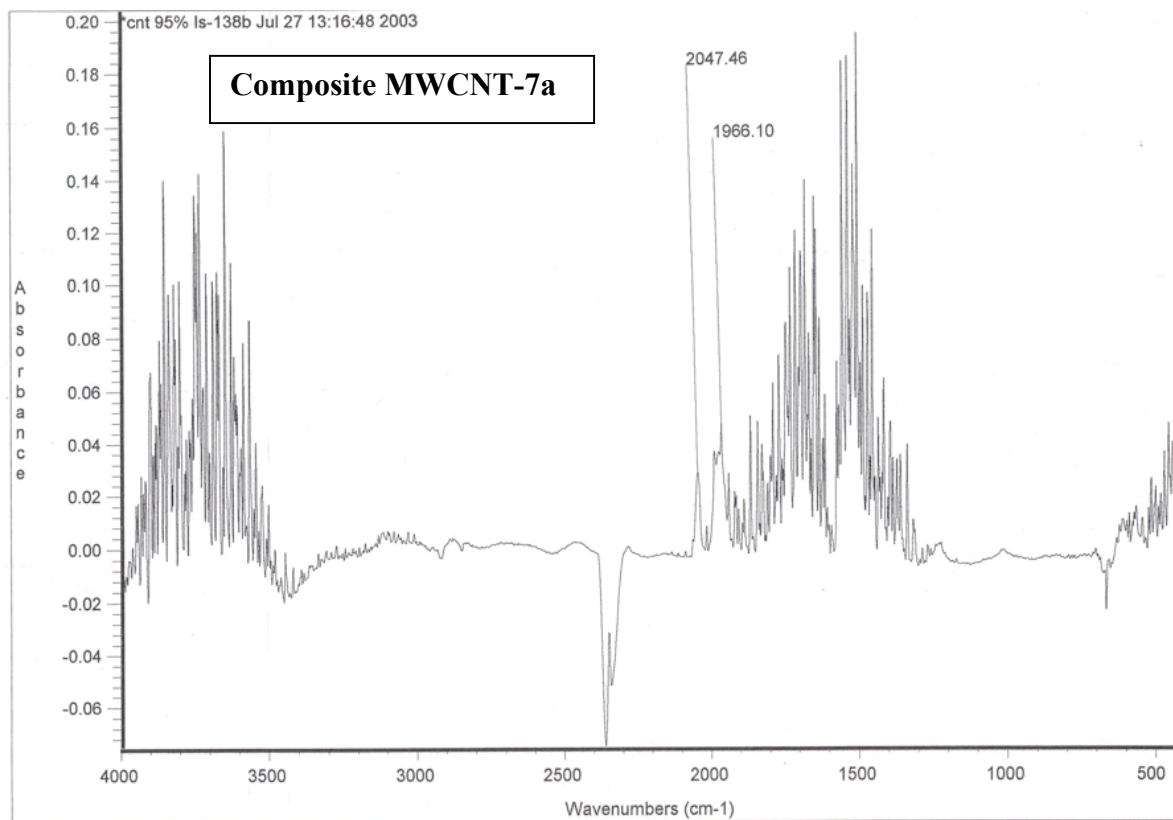

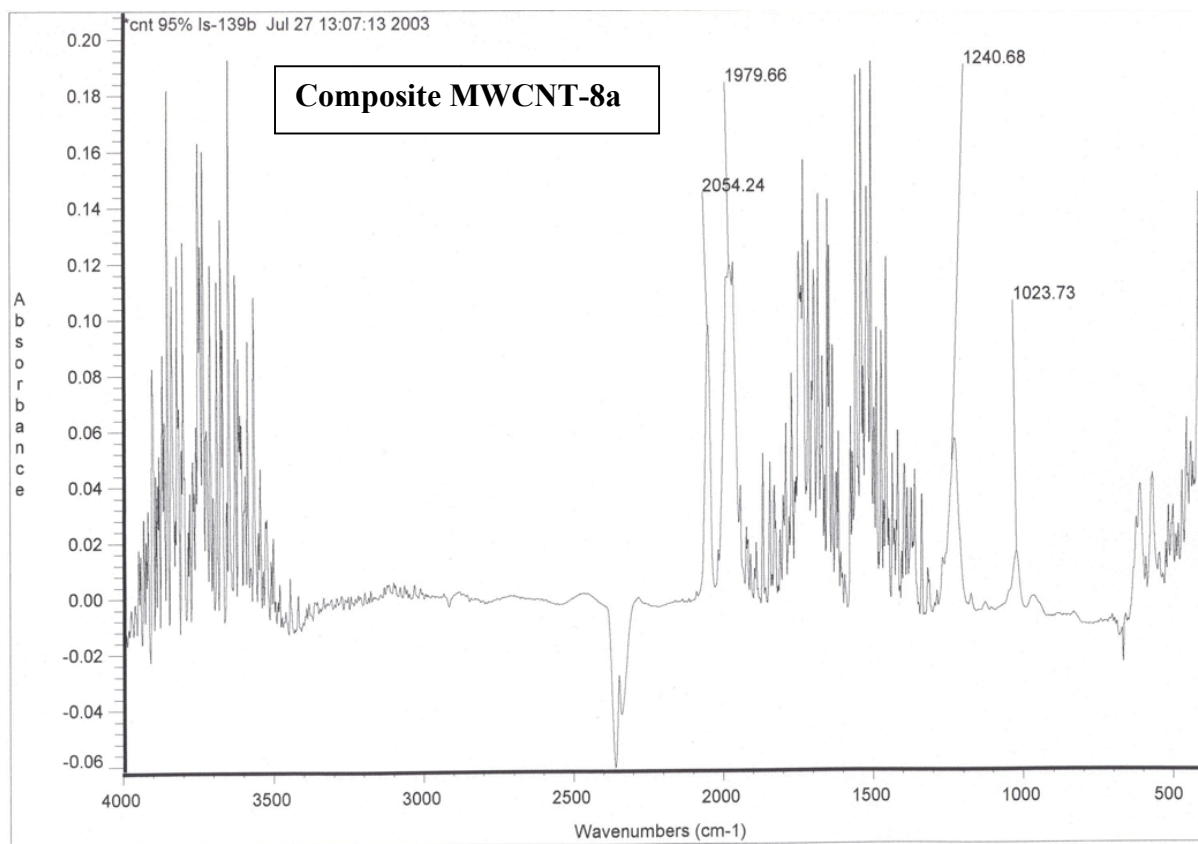

**Table of characteristic metallic Fe-C≡O absorption peaks: neutral  $\eta^4$ -(1*E*,3*E*)-dienyl-Fe(CO)<sub>3</sub> complexes *before* and *after* noncovalent adsorption onto MWCNTs (nanocomposite FT-IR analysis)**

| <b>Iron Complex</b> | <b><math>\nu_{\text{CO}}</math> (<i>before</i> adsorption onto MWCNTs, cm<sup>-1</sup>)</b> | <b><math>\nu_{\text{CO}}</math> (<i>after</i> adsorption onto MWCNTs, cm<sup>-1</sup>)</b> |
|---------------------|---------------------------------------------------------------------------------------------|--------------------------------------------------------------------------------------------|
| <b>1a</b>           | 1986.4, 2047.5                                                                              | 1986.4, 2061.0                                                                             |
| <b>3a</b>           | 1972.9, 2040.7                                                                              | 1966.1, 2047.5                                                                             |
| <b>4a</b>           | 1966.9, 2048.0                                                                              | 1993.2, 2061.0                                                                             |
| <b>5a</b>           | 1967.0, 2048.0                                                                              | 1967.0, 2048.0                                                                             |
| <b>6a</b>           | 1980.5, 2068.3                                                                              | 1994.0, 2068.3                                                                             |
| <b>7a</b>           | 1986.4, 2047.5                                                                              | 1966.1, 2047.5                                                                             |
| <b>8a</b>           | 1972.9, 2047.5                                                                              | 1979.7, 2054.2                                                                             |

### 3. Selected high resolution scanning electron microscope (SEM) pictures of MWCNTs decorated by the neutral iron complex **5a** (EDAX elemental analyses)

**EDAX elemental analyses of composite MWCNT-5a (Figures 2A & 2C).** Figs. 2A & 2C reported HR-SEM images of several bundles of MWCNTs of various diameters (130 nm-1.0  $\mu\text{m}$ ) that were modified by the neutral iron complex **5a**. All these elemental EDAX analyses disclosed an iron-enriched surface compatible with the presence of **5a** onto CNT sidewalls.

**Figure 2A:** magnification: 10000, accelerating voltage: 15.0 kV

| Net Counts         |            |            |             |             |             |
|--------------------|------------|------------|-------------|-------------|-------------|
|                    | <i>C-K</i> | <i>O-K</i> | <i>Fe-K</i> | <i>Cu-K</i> | <i>Zn-K</i> |
| <i>Base(1)_pt1</i> | 139554     | 1839       | 3350        | 1240        | 400         |

  

| Weight Concentration % |            |            |             |             |             |
|------------------------|------------|------------|-------------|-------------|-------------|
|                        | <i>C-K</i> | <i>O-K</i> | <i>Fe-K</i> | <i>Cu-K</i> | <i>Zn-K</i> |
| <i>Base(1)_pt1</i>     | 90.06      | 4.97       | 2.30        | 1.86        | 0.81        |

  

| Weight % Error     |            |            |             |             |             |
|--------------------|------------|------------|-------------|-------------|-------------|
|                    | <i>C-K</i> | <i>O-K</i> | <i>Fe-K</i> | <i>Cu-K</i> | <i>Zn-K</i> |
| <i>Base(1)_pt1</i> | +/-0.43    | +/-0.24    | +/-0.10     | +/-0.11     | +/-0.11     |

  

| Atom Concentration % |            |            |             |             |             |
|----------------------|------------|------------|-------------|-------------|-------------|
|                      | <i>C-K</i> | <i>O-K</i> | <i>Fe-K</i> | <i>Cu-K</i> | <i>Zn-K</i> |
| <i>Base(1)_pt1</i>   | 95.01      | 3.94       | 0.52        | 0.37        | 0.16        |

  

| Atom % Error       |            |            |             |             |             |
|--------------------|------------|------------|-------------|-------------|-------------|
|                    | <i>C-K</i> | <i>O-K</i> | <i>Fe-K</i> | <i>Cu-K</i> | <i>Zn-K</i> |
| <i>Base(1)_pt1</i> | +/-0.46    | +/-0.19    | +/-0.02     | +/-0.02     | +/-0.02     |



**Figure 2C (Au-evaporated sample):** magnification: 35000, accelerating voltage: 15.0 kV

| Net Counts          |            |             |             |             |             |
|---------------------|------------|-------------|-------------|-------------|-------------|
|                     | <i>C-K</i> | <i>Fe-K</i> | <i>Cu-K</i> | <i>Zn-K</i> | <i>Au-L</i> |
| <i>Base(54)_pt1</i> | 4001       | 1144        | 1680        | 724         | 3669        |

  

| Weight Concentration % |            |             |             |             |             |
|------------------------|------------|-------------|-------------|-------------|-------------|
|                        | <i>C-K</i> | <i>Fe-K</i> | <i>Cu-K</i> | <i>Zn-K</i> | <i>Au-L</i> |
| <i>Base(54)_pt1</i>    | 20.03      | 1.73        | 4.96        | 2.78        | 70.50       |

  

| Weight % Error      |            |             |             |             |             |
|---------------------|------------|-------------|-------------|-------------|-------------|
|                     | <i>C-K</i> | <i>Fe-K</i> | <i>Cu-K</i> | <i>Zn-K</i> | <i>Au-L</i> |
| <i>Base(54)_pt1</i> | +/-0.36    | +/-0.25     | +/-0.29     | +/-0.34     | +/-4.73     |

  

| Atom Concentration % |            |             |             |             |             |
|----------------------|------------|-------------|-------------|-------------|-------------|
|                      | <i>C-K</i> | <i>Fe-K</i> | <i>Cu-K</i> | <i>Zn-K</i> | <i>Au-L</i> |
| <i>Base(54)_pt1</i>  | 76.61      | 1.42        | 3.58        | 1.95        | 16.44       |

  

| Atom % Error        |            |             |             |             |             |
|---------------------|------------|-------------|-------------|-------------|-------------|
|                     | <i>C-K</i> | <i>Fe-K</i> | <i>Cu-K</i> | <i>Zn-K</i> | <i>Au-L</i> |
| <i>Base(54)_pt1</i> | +/-1.36    | +/-0.20     | +/-0.21     | +/-0.24     | +/-1.10     |

**Additional microphotographs & EDAX analyses of composite MWCNT-5a (Au-evaporated sample):**

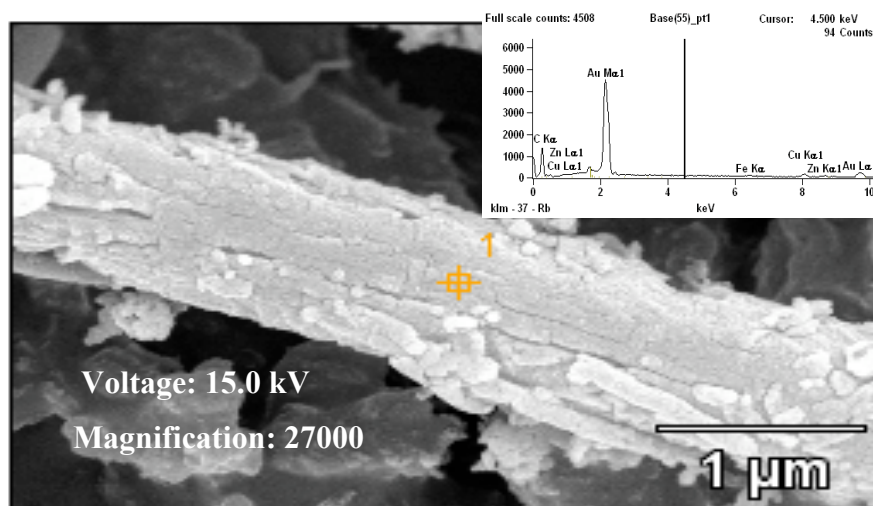

| Net Counts          |            |             |             |             |             |
|---------------------|------------|-------------|-------------|-------------|-------------|
|                     | <i>C-K</i> | <i>Fe-K</i> | <i>Cu-K</i> | <i>Zn-K</i> | <i>Au-L</i> |
| <i>Base(55)_pt1</i> | 8000       | 374         | 1744        | 829         | 5243        |

  

| Weight Concentration % |            |             |             |             |             |
|------------------------|------------|-------------|-------------|-------------|-------------|
|                        | <i>C-K</i> | <i>Fe-K</i> | <i>Cu-K</i> | <i>Zn-K</i> | <i>Au-L</i> |
| <i>Base(55)_pt1</i>    | 25.47      | 0.38        | 3.48        | 2.15        | 68.51       |

  

| Weight % Error      |            |             |             |             |             |
|---------------------|------------|-------------|-------------|-------------|-------------|
|                     | <i>C-K</i> | <i>Fe-K</i> | <i>Cu-K</i> | <i>Zn-K</i> | <i>Au-L</i> |
| <i>Base(55)_pt1</i> | +/-0.25    | +/-0.09     | +/-0.40     | +/-0.26     | +/-3.79     |

  

| Atom Concentration % |            |             |             |             |             |
|----------------------|------------|-------------|-------------|-------------|-------------|
|                      | <i>C-K</i> | <i>Fe-K</i> | <i>Cu-K</i> | <i>Zn-K</i> | <i>Au-L</i> |
| <i>Base(55)_pt1</i>  | 82.74      | 0.27        | 2.14        | 1.28        | 13.57       |

  

| Atom % Error        |            |             |             |             |             |
|---------------------|------------|-------------|-------------|-------------|-------------|
|                     | <i>C-K</i> | <i>Fe-K</i> | <i>Cu-K</i> | <i>Zn-K</i> | <i>Au-L</i> |
| <i>Base(55)_pt1</i> | +/-0.82    | +/-0.07     | +/-0.25     | +/-0.15     | +/-0.75     |

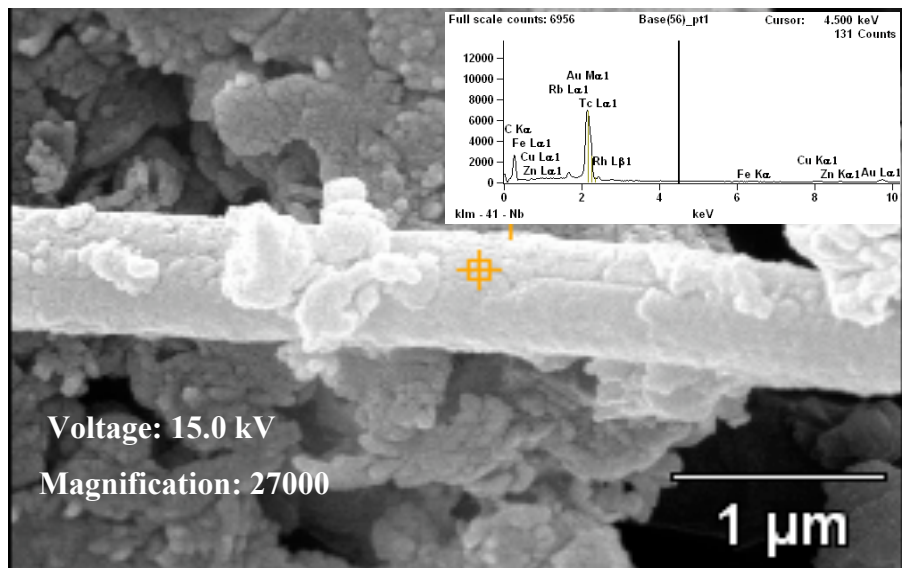

| Net Counts   |       |      |      |      |      |      |      |      |
|--------------|-------|------|------|------|------|------|------|------|
|              | C-K   | Fe-K | Cu-K | Zn-K | Rb-L | Tc-L | Rh-L | Au-L |
| Base(56)_pt1 | 15881 | 715  | 2390 | 946  | 1276 | 2039 | 671  | 6295 |

| Weight Concentration % |       |      |      |      |      |      |      |       |
|------------------------|-------|------|------|------|------|------|------|-------|
|                        | C-K   | Fe-K | Cu-K | Zn-K | Rb-L | Tc-L | Rh-L | Au-L  |
| Base(56)_pt1           | 33.37 | 0.52 | 3.41 | 1.76 | 0.39 | 0.99 | 0.30 | 59.27 |

| Weight % Error |         |         |         |         |         |         |         |         |
|----------------|---------|---------|---------|---------|---------|---------|---------|---------|
|                | C-K     | Fe-K    | Cu-K    | Zn-K    | Rb-L    | Tc-L    | Rh-L    | Au-L    |
| Base(56)_pt1   | +/-0.34 | +/-0.08 | +/-0.17 | +/-0.21 | +/-0.05 | +/-0.17 | +/-0.08 | +/-3.02 |

| Atom Concentration % |       |      |      |      |      |      |      |      |
|----------------------|-------|------|------|------|------|------|------|------|
|                      | C-K   | Fe-K | Cu-K | Zn-K | Rb-L | Tc-L | Rh-L | Au-L |
| Base(56)_pt1         | 87.19 | 0.29 | 1.68 | 0.85 | 0.14 | 0.31 | 0.09 | 9.44 |

| Atom % Error |         |         |         |         |         |         |         |         |
|--------------|---------|---------|---------|---------|---------|---------|---------|---------|
|              | C-K     | Fe-K    | Cu-K    | Zn-K    | Rb-L    | Tc-L    | Rh-L    | Au-L    |
| Base(56)_pt1 | +/-0.88 | +/-0.04 | +/-0.09 | +/-0.10 | +/-0.02 | +/-0.05 | +/-0.03 | +/-0.48 |

**EDS Linescan elemental analysis of iron-complexed composite MWCNT-5a:** magnification: 30000, accelerating voltage: 15.0 kV (Fe elemental composition indicated in red)

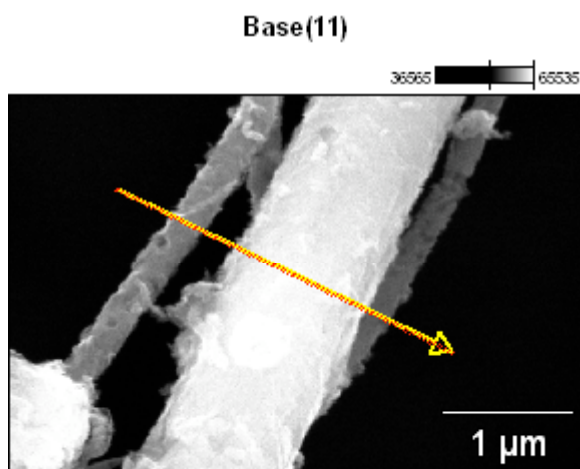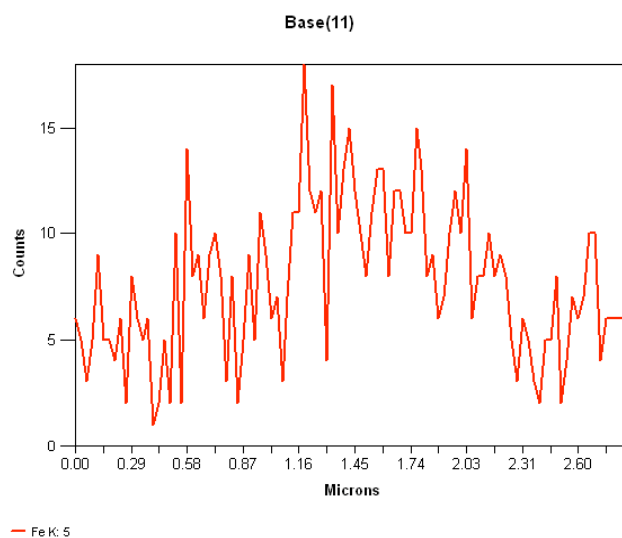

**4. Selected high resolution transmission electron microscope (TEM) pictures of MWCNTs decorated by the neutral iron complex 5a (EDAX Elemental Analyses).**

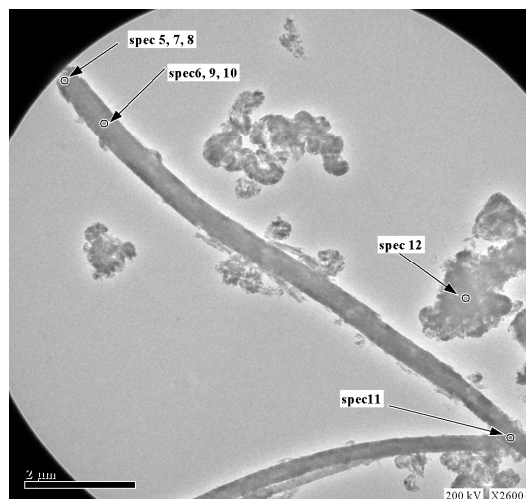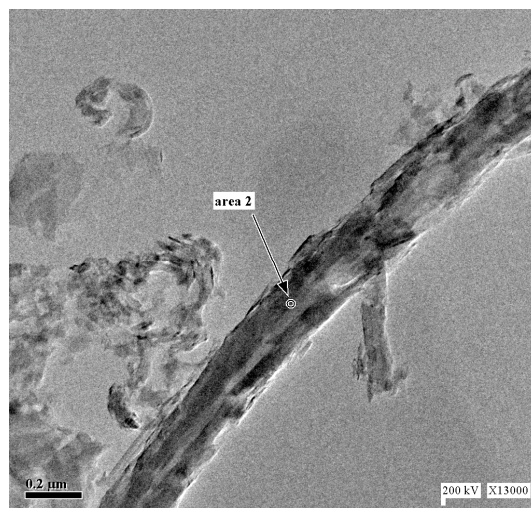

**EDAX analyses** (Processing Option: all elements analyzed (normalized), all results in weight percent)

| <b>Spectrum</b>    | <b>C</b> | <b>O</b> | <b>Fe</b> | <b>Total</b> |
|--------------------|----------|----------|-----------|--------------|
| Tube 1 area 2      | 99.23    | 0.73     | 0.04      | 100.00       |
| Tube 1 area > 35nm | 98.20    | 1.00     | 0.80      | 100.00       |
| Spectrum 5         | 99.27    | 0.61     | 0.12      | 100.00       |
| Spectrum 6         | 98.95    | 0.71     | 0.34      | 100.00       |
| Spectrum 7         | 99.03    | 0.68     | 0.29      | 100.00       |
| Spectrum 8         | 98.74    | 0.71     | 0.55      | 100.00       |
| Spectrum 9         | 99.24    | 0.52     | 0.24      | 100.00       |
| Spectrum 10        | 98.93    | 0.63     | 0.44      | 100.00       |
| Spectrum 11        | 98.79    | 0.71     | 0.50      | 100.00       |
| Spectrum 12        | 98.44    | 0.77     | 0.79      | 100.00       |
| Max.               | 99.27    | 1.00     | 0.80      |              |
| Min.               | 98.20    | 0.52     | 0.04      |              |

## 5. Selected XPS data for MWCNTs decorated by neutral iron complexes, 1a, 3a-4a, and 7a-8a.

### Composite MWCNT-1a

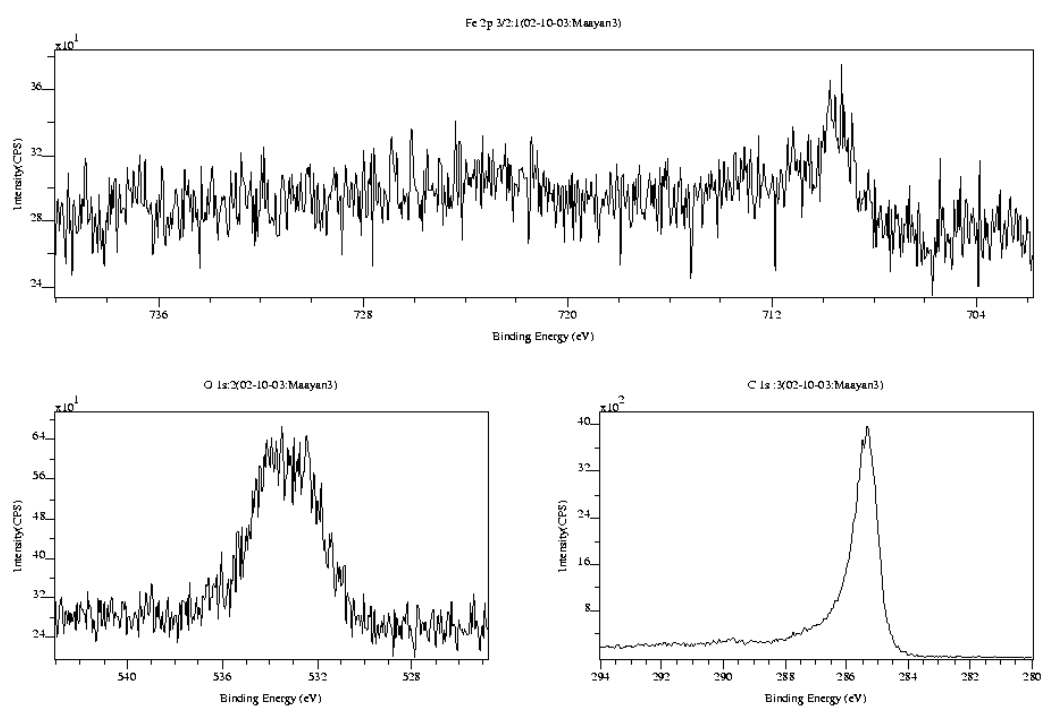

## Composite MWCNT-3a

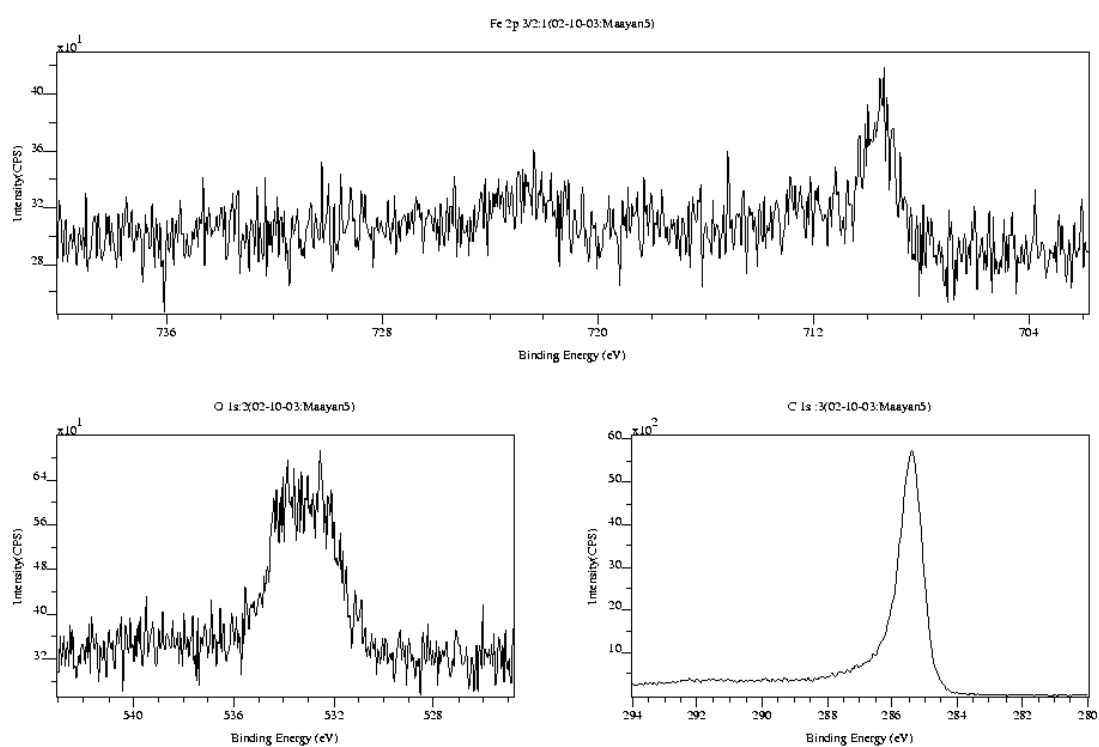

## Composite MWCNT-4a

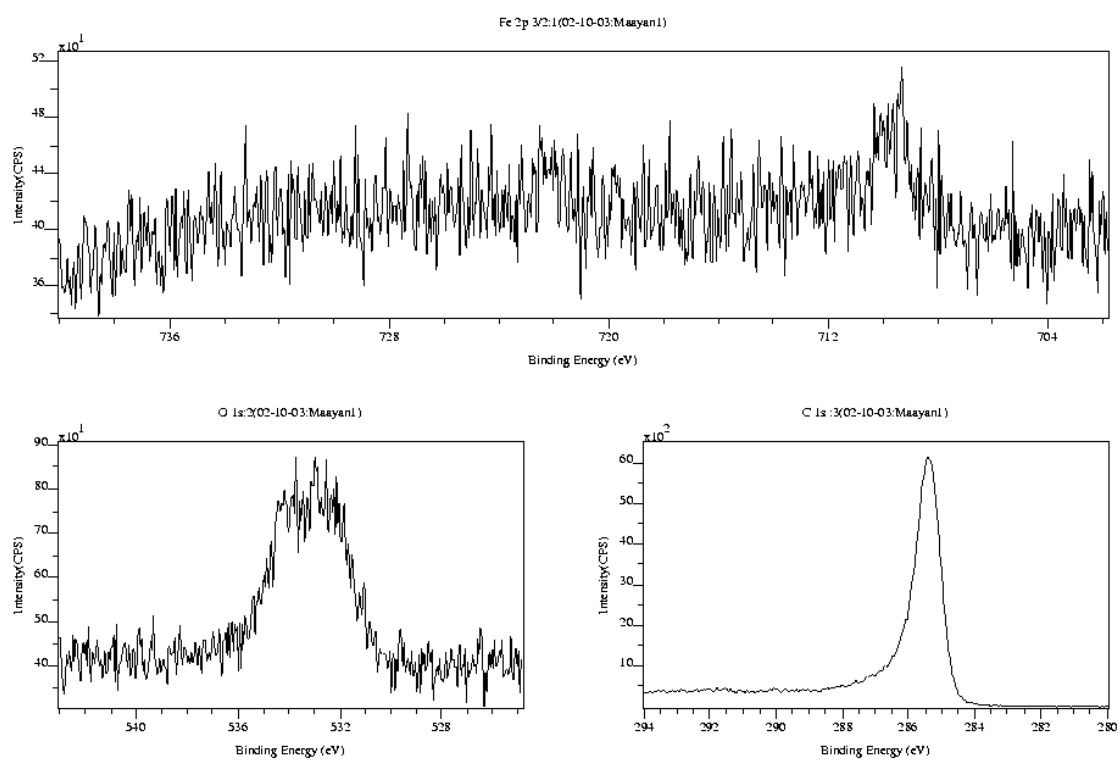

## Composite MWCNT-7a

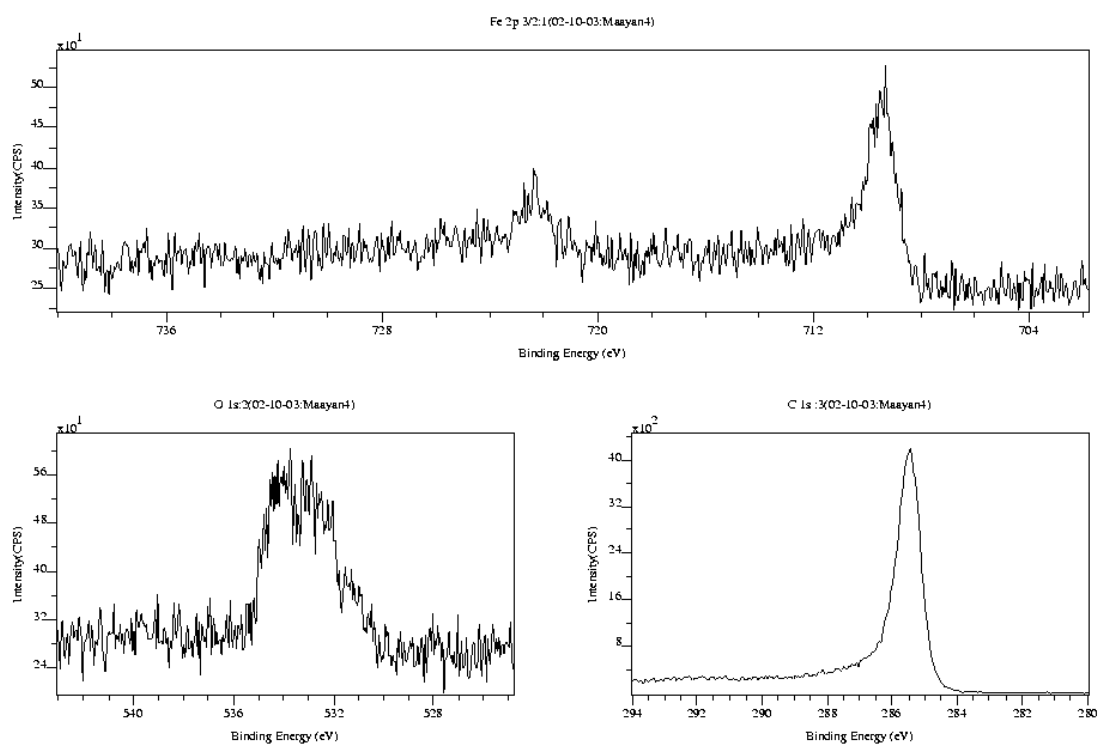

## Composite MWCNT-8a

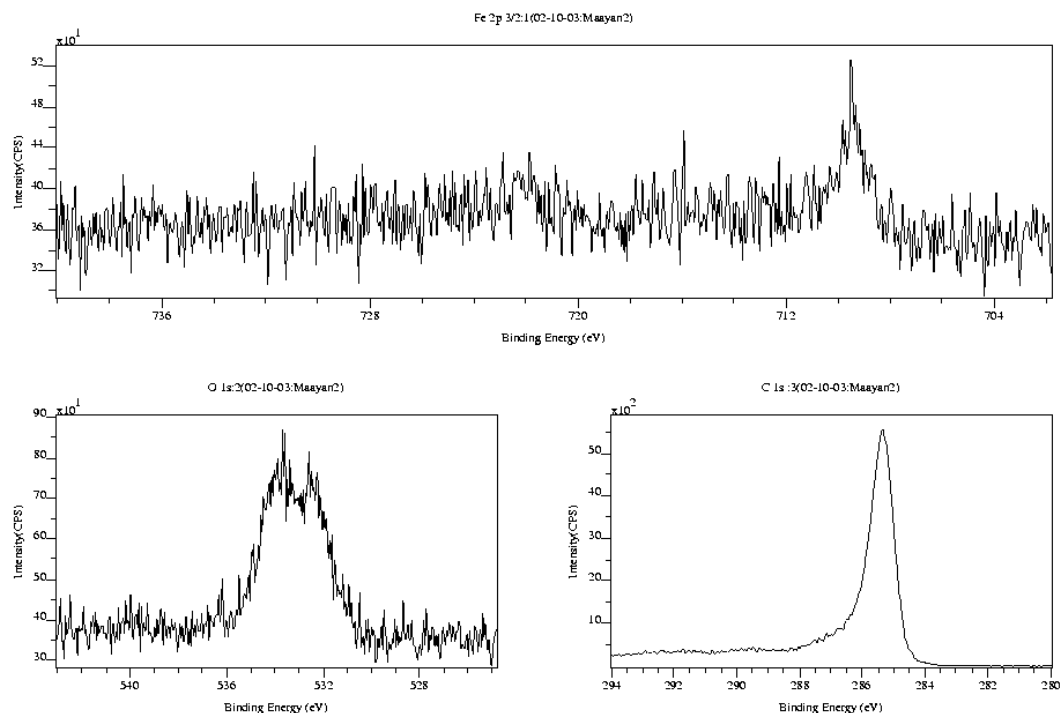

The whole set of XPS spectra showed only the presence of carbon, oxygen, and iron elements. All the high-resolution C 1s spectra exhibited a narrow peak at around 285.5 eV (before calibration), with a long tail to the high-binding energy (BE) region, as commonly observed for graphitic carbons. The wide O 1s peaks indicated the presence of at least two to three oxygen-containing species, most likely originating from carbonyl, alcohol, and/or acetate moieties of ligands. BE-corrected Fe 2p 3/2 peaks were positioned at *ca.* 709.0 eV, characteristic of iron species in a low oxidation state, and in interaction with C≡O ligands. In most cases, Fe 2p features were narrow, suggesting that the iron on MWCNT surfaces existed in only one single oxidation state.



6. Selected high resolution scanning electron microscope (SEM) pictures of MWCNTs after iron complex desorption. Case of the CH<sub>3</sub>CN-dissociated composite MWCNT-5a (EDAX elemental analysis) - Magnifications: (a) 40000, (b) 750000, accelerating voltage: 15.0 kV -

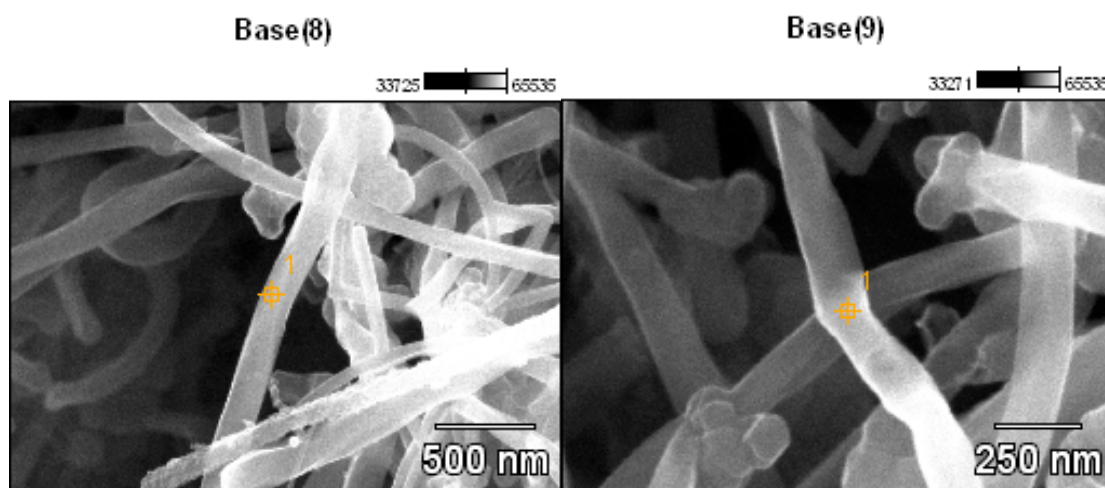

(a) Magnification: 40000

(b): Magnification: 75000

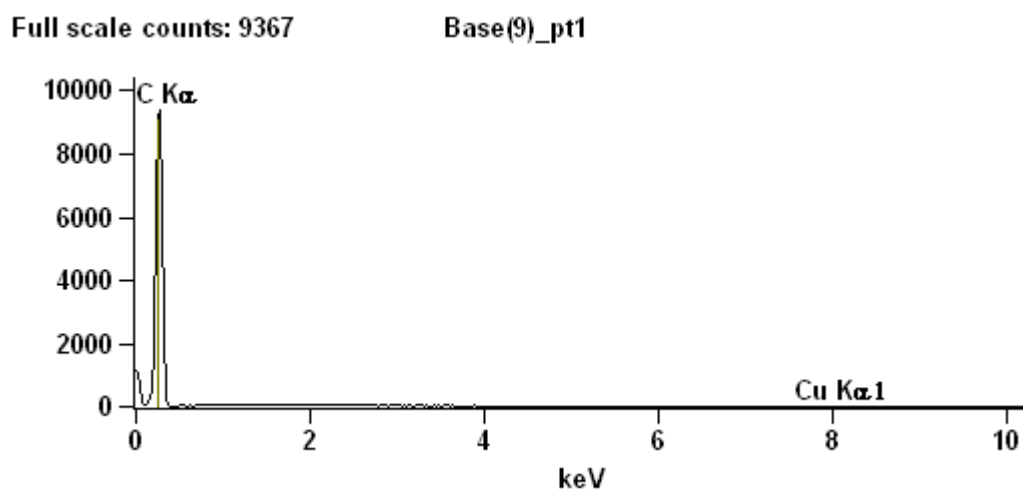

Net Counts

|                    | <b>C-K</b> | <b>Cu-K</b> |
|--------------------|------------|-------------|
| <i>Base(9)_pt1</i> | 66403      | 212         |

Weight Concentration %

|                    | <b>C-K</b> | <b>Cu-K</b> |
|--------------------|------------|-------------|
| <i>Base(9)_pt1</i> | 99.11      | 0.89        |

Weight % Error

|                    | <b>C-K</b> | <b>Cu-K</b> |
|--------------------|------------|-------------|
| <i>Base(9)_pt1</i> | +/-0.52    | +/-0.14     |

Atom Concentration %

|                    | <b>C-K</b> | <b>Cu-K</b> |
|--------------------|------------|-------------|
| <i>Base(9)_pt1</i> | 99.83      | 0.17        |

Atom % Error

|                    | <b>C-K</b> | <b>Cu-K</b> |
|--------------------|------------|-------------|
| <i>Base(9)_pt1</i> | +/-0.52    | +/-0.03     |

**7. GLOBAL-Energy GMMX-minimized structures of effective and selected ineffective complexes, 1a, 3a-4a, and 6a-8a and  $\psi$ -endo/ $\psi$ -exo-9a and 10a** (PCMODEL V8.0 software, Serena Software, Bloomington, USA)

| Iron Complex | Front View                                                                                                                                                                                                                                                                                                                                                                                                                     | Side View                                                                                                                                                                                                                                                                                                                                                                                                                       |
|--------------|--------------------------------------------------------------------------------------------------------------------------------------------------------------------------------------------------------------------------------------------------------------------------------------------------------------------------------------------------------------------------------------------------------------------------------|---------------------------------------------------------------------------------------------------------------------------------------------------------------------------------------------------------------------------------------------------------------------------------------------------------------------------------------------------------------------------------------------------------------------------------|
| 1a           | 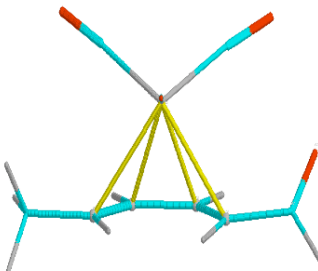 <p>Front view of Iron complex 1a. The structure shows an iron atom (grey) coordinated to two cyan-colored ligands (likely ethylenediamine) and two red-colored ligands (likely hydroxyl groups). The iron atom is also coordinated to a yellow-colored ligand (likely a carbonyl group). The structure is shown in a perspective view.</p>  |  <p>Side view of Iron complex 1a. The structure shows the iron atom (grey) coordinated to two cyan-colored ligands (likely ethylenediamine) and two red-colored ligands (likely hydroxyl groups). The iron atom is also coordinated to a yellow-colored ligand (likely a carbonyl group). The structure is shown in a perspective view.</p>  |
| 3a           |  <p>Front view of Iron complex 3a. The structure shows an iron atom (grey) coordinated to two cyan-colored ligands (likely ethylenediamine) and two red-colored ligands (likely hydroxyl groups). The iron atom is also coordinated to a yellow-colored ligand (likely a carbonyl group). The structure is shown in a perspective view.</p> |  <p>Side view of Iron complex 3a. The structure shows the iron atom (grey) coordinated to two cyan-colored ligands (likely ethylenediamine) and two red-colored ligands (likely hydroxyl groups). The iron atom is also coordinated to a yellow-colored ligand (likely a carbonyl group). The structure is shown in a perspective view.</p> |

|    |                                                                                     |                                                                                       |
|----|-------------------------------------------------------------------------------------|---------------------------------------------------------------------------------------|
| 4a | 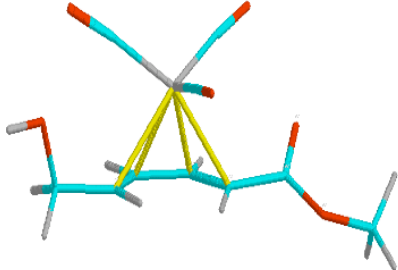   |    |
| 6a |   |   |
| 7a |  |  |
| 8a |  |   |

| Iron<br>Complex                   | Front View                                                                          | Side View                                                                             |
|-----------------------------------|-------------------------------------------------------------------------------------|---------------------------------------------------------------------------------------|
| <i>ψ</i> - <i>exo</i> <b>10a</b>  | 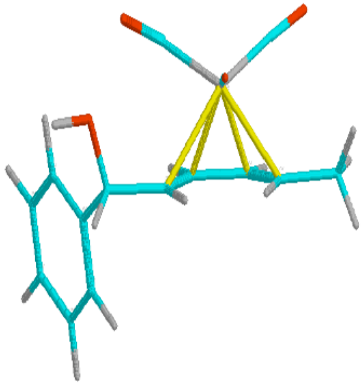   |    |
| <i>ψ</i> - <i>endo</i> <b>10a</b> |  |   |
| <i>ψ</i> - <i>endo</i> <b>9a</b>  |  |  |

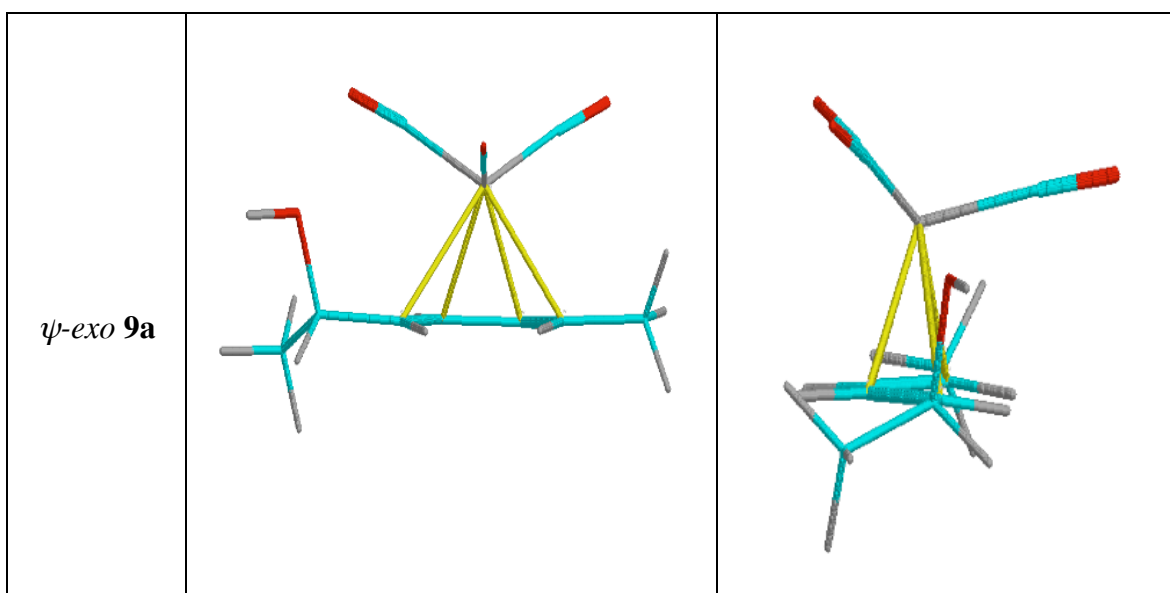

Diedre angles  $C\beta C\gamma-C\delta C\epsilon$  of iron complexes belonging to the  $\text{Fe}(\text{CO})_3$  series. **1a**:  $1^\circ$ , **3a**:  $1^\circ$ , **4a**:  $0^\circ$ , **6a**:  $7^\circ$ , **7a**:  $0^\circ$ , and **8a**:  $0^\circ$

**8. XPS analysis of untreated (a) and oxidized (b) MER Corporation MWCNTs** (Surface Science Instrument, model SSX-100: survey scan of both C 1s and O 1s peaks including peak deconvolution)

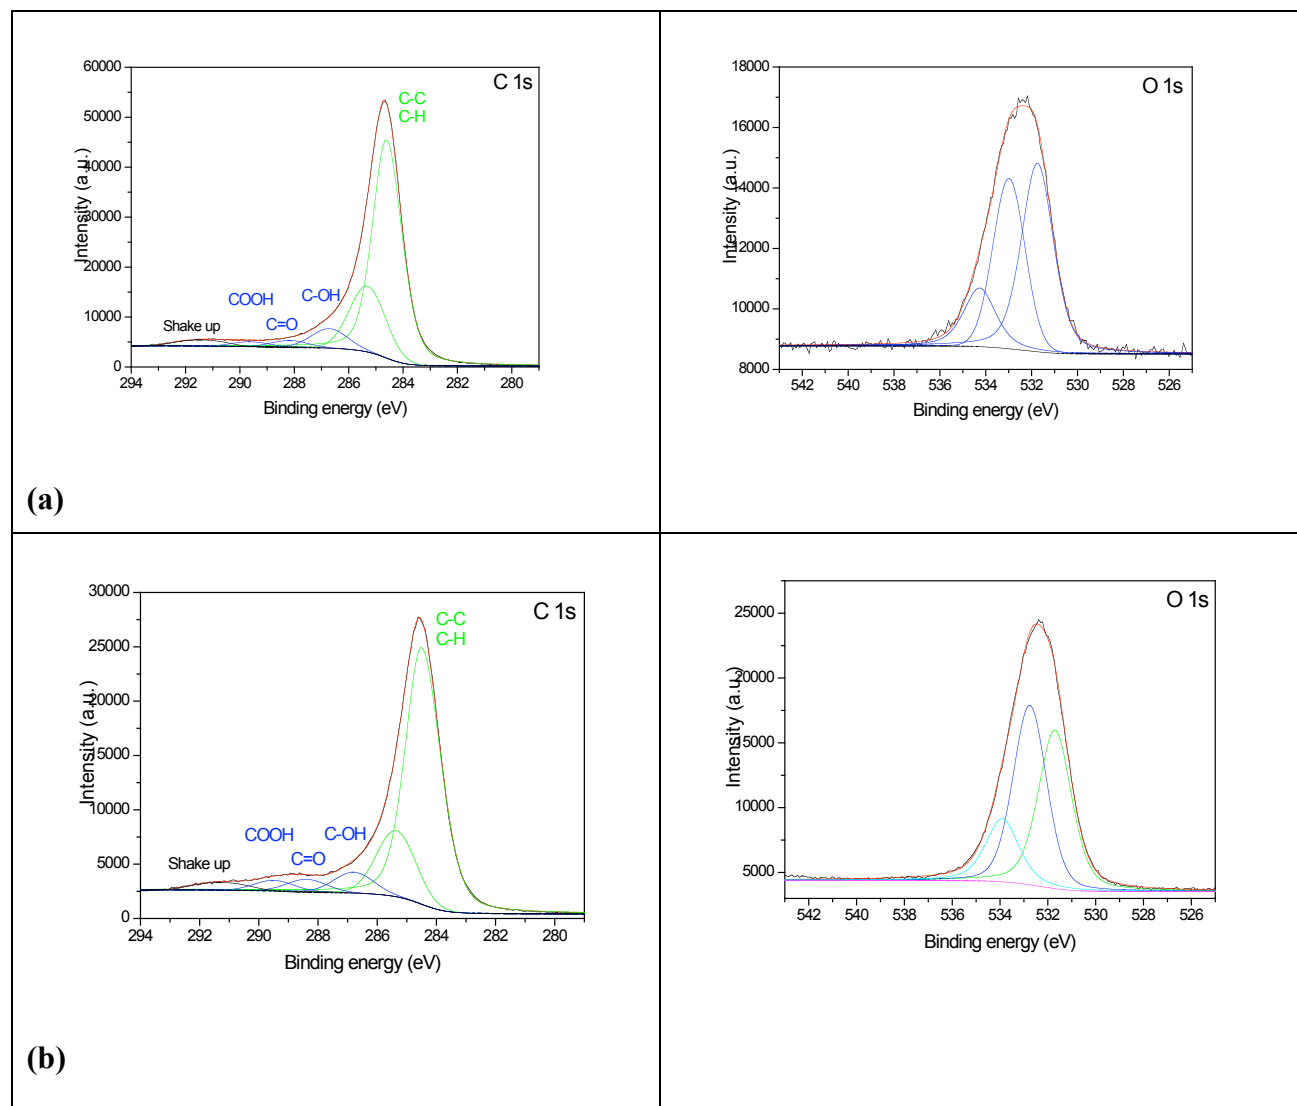

## 9. Thermogravimetric analysis of iron-complexed composites. Case of composite MWCNT-5a

Sample: cnt complex 3  
Size: 1.5880 mg  
Method: Ramp

DSC-TGA

File: C:\...new complex\cnt complex 3.001  
Operator: maytal  
Run Date: 15-Apr-2007 09:59  
Instrument: SDT Q600 V8.1 Build 99

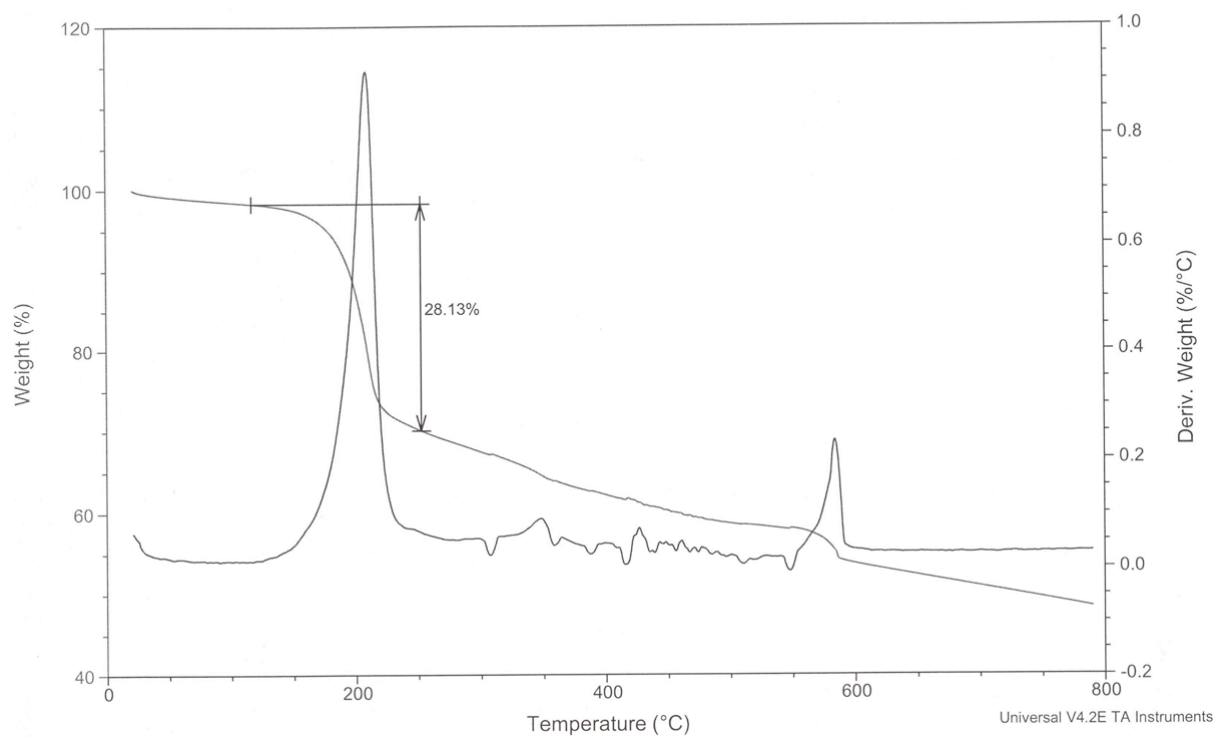



**10. Raman spectra of MWCNT samples (MWCNTs obtained after dissociation of composite MWCNT-5a and untreated starting MWCNTs).**

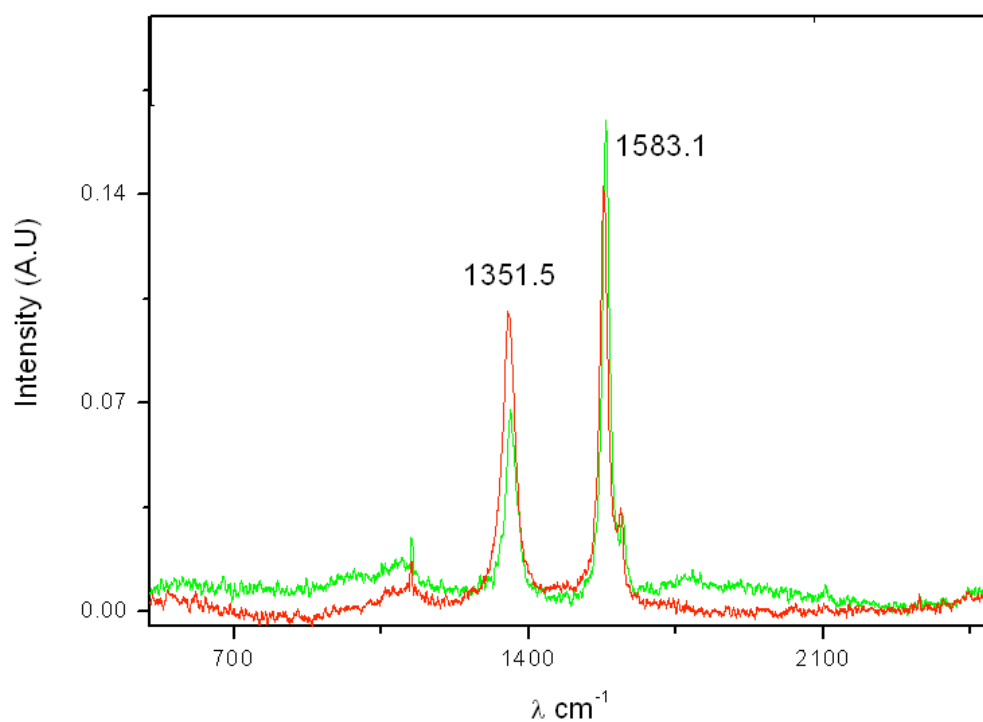

Green curve: untreated starting MER MWCNTs, red curve: MWCNT sample obtained *after*  $\text{CH}_3\text{CN}$ -mediated dissociation of composite MWCNT-5a
